# Supplementary material for: Risk Factors for Sepsis Based on Sepsis-3 Criteria after Orthotopic Liver Transplantation
Source: Mediators Inflamm. 2018 Jun 20;2018:8703172. doi: 10.1155/2018/8703172 (PMC6031077; doi:10.1155/2018/8703172)
Supplement: Supplementary Materials — Supplementary Table 1: diagnosis of the 85 sepsis patients according to Sepsis-3 criteria. [file 8703172.f1.zip]

Archive with 2 entries (2 files):
- 8703172.f1/Supplemental-Excel File 1.xls
- 8703172.f1/Supplemental-Table 1.doc
