# Supplementary material for: Risk Factors for Sepsis Based on Sepsis-3 Criteria after Orthotopic Liver Transplantation
Source: Mediators Inflamm. 2018 Jun 20;2018:8703172. doi: 10.1155/2018/8703172 (PMC6031077; doi:10.1155/2018/8703172)
Supplement: Supplementary Materials — Supplementary Table 1: diagnosis of the 85 sepsis patients according to Sepsis-3 criteria. [file 8703172.f1.zip › 8703172.f1/Supplemental-Excel File 1.xls]

## Sheet: Spesis 3 diagnosis
Case No.	Time (after OLT)	Pulmonary infection(Sputum culture and lung X-ray)(P-Positive)	Intestinal infection(Stool culture)(P-Positive)	Urinary system infection(Urine culture)(P-Positive)	Infection of biliary tract (P-Positive)	Blood infection (Blood culture)(P-Positive)	CRP（mg/L）	PCT（ng/ml）	Mechanical ventilation (Y-Yes)	PaO2/FiO2 (mmHg)	Respiratory system score	Glasgow score	Nervous system score	Cardiovascular system score	Bilirubin (μmol/L)	Liver function score	PLT（×109）	Coagulation system score	Creatinine	urine volume (ml/d) (blank means normal)	Kidney function score	SOFA	Therapy
1	6d	P					25.42	30.65	Y	178	3	6	4	4	80.53	2	48	3	118		1	17	MP+VY+MD+CF+GC
2	3d	P					21.76	15.59		284	2	12	2	0	62.15	2	245	0	177		1	7	MP+VY+CF+GC
3	2d	P					34.07	86.98		268	2	15	0	1	24.85	1	59	0	112	400	3	7	MP+VY+MD+GC
4	5d		P				39.7	5.59		341	1	14	1	4	75.35	2	82	2	86		0	10	PT+MD+GC
5	2d	P					64.9	13.76		299	2	13	1	0	107.28	3	309	0	65		0	6	PT+LF+VY+MD
6	22h			P	P		30.86	30.6	Y	132	3	12	2	1	102.24	3	79	2	230	400	3	14	MP+VY+MD+GC
7	4d	P					80.05	60.15		287	2	13	1	0	19.64	0	94	2	89		0	5	PT+MD+CF+GC
8	5d	P					87.34	26.79		389	1	15	0	0	13.46	0	277	0	560	100	4	5	PT+MD+GC
9	2d	P					35.91	10.74		324	1	15	0	0	95.53	2	60	2	83		0	5	MP+MD+MS+GC
10	3d	P					37.05	7.42		318	1	15	0	1	19.95	0	100	1	113		1	4	PT+MS+GC
11	3d		P				15.2	17.93		367	1	15	0	0	87.34	2	273	0	137		4	7	MP+MD+VY+GC
12	5d	P					17.7	31.85		267	2	15	0	0	30.86	1	106	1	79		0	4	PT+MD+CF+GC
13	5d	P					51.9	92.63		218	2	11	2	4	32.83	2	120	1	233		4	15	IP+VY+MD+CF+GC
14	6d		P				28.8	2.82		398	1	15	0	0	115.19	3	284	0	95		0	4	MP+VY+MD+CF+GC
15	6d					P	23.4	42.93		324	1	15	0	4	80.05	2	`163	0	102		0	7	PT+VY+CF+GC
16	4d	P					21.6	25.85		247	2	15	0	4	100.73	2	68	2	105		3	13	MP+VY+CF+GC
17	7d		P				35.2	42.57		412	0	12	2	4	22.25	1	84	2	155		1	10	MP+VY+MD+MS+GC
18	3d					P	55.88	5.07		503	0	10	2	0	81.88	2	271	0	138		1	5	CSS+IP
19	1d	P					37.3	25.99	Y	176	3	10	2	0	80.2	2	100	1	213	180	4	12	PT+MD+CF+GC
20	4d	P					40.6	117.21		258	2	10	2	4	14.7	0	195	0	95		0	8	MP+VY+MD+GC
21	3d	P		P			30.36	21.76		360	1	15	0	0	38.75	2	149	1	183	350	3	7	PT+MD+MS+GC+EC
22	5d		P				70	21.31		309	1	15	0	0	82	3	48	3	54		0	7	MP+MD+VY+CF+GC
23	4d		P				33.3	25.8		257	2	15	0	0	32.77	1	47	3	92		0	6	PT+MD+MS+GC
24	7d					P	25.69	11.99		392	1	15	0	4	120	3	52	2	170		1	11	PT+MD+LF+CF+VY+GC+EC
25	10d	P					47	44.34		231	2	15	2	1	294	4	31	3	120		3	15	MP+MD+VY+CF+GC
26	6d	P				P	35	10.56		259	2	15	2	0	49.3	2	74	2	48		0	8	MP+MD+CSS
27	5d	P			P	P	46.84	42.18		265	2	8	3	0	134	3	21	3	69		0	11	MD+MP+VY+CF+CSS
28	24h	P					38.54	8.62	Y	152	3	15	0	0	26	1	86	2	57		0	6	PT+CSS+CF
29	4d					P	49.36	3.46		213	2	15	0	0	26.5	1	22	3	191		3	9	PT+MD+CF+EC+GC
30	6d	P					25.64	4.63	Y	184	3	12	2	4	113	3	98	2	201		3	17	MP+CF+EC
31	2d					P	24.59	29.34		383	1	15	0	4	53.3	2	82	2	87		0	9	MP+CF+MD+EC
32	10d		P		P		23.9	32.84		277	2	12	2	1	109.2	3	94	2	94		0	10	PT+MD+MS+GC
33	2d	P					14.5	10.13		328	1	15	0	0	32.92	2	51	2	78		0	5	MP+CF+EC
34	3d		P				23.28	7.07		337	1	15	0	1	334	4	53	2	66		0	8	PT+MD+MS+GC
35	4d		P				51.84	23.1		525	0	7	3	2	64	2	64	2	149		3	12	PT+IN+GC
36	3d	P					89.3	8.22		293	2	9	3	4	22	1	52	2	93		2	14	MP+MD+VY+CF+GC
37	2d	P				P	14	8.2		234	2	12	2	4	304.2	4	14	4	137		1	17	PT+IN+GC
38	6d	P			P		46.47	32.83	Y	169	3	15	0	2	150.2	3	51	2	142		1	11	CSS+MD+MS+EC
39	7d		P				43.21	5.79		394	1	15	0	2	196.59	3	99	2	130		3	11	MP+CSS+VY+CF
40	4d					P	28.04	59.05		333	1	15	0	4	167.99	3	55	2	98		0	10	CSS+IP
41	2d	P					14.3	7.7		230	2	15	0	0	30.96	3	100	1	76		0	6	TP+MF+VY+VN
42	3d	P					14.2	28.04	Y	190	3	7	3	3	52.33	2	38	3	149		1	15	IP+MD+VY
43	5d	P					89.9	11.54		209	2	15	1	0	41.99	2	33	3	81		0	8	MP+CF+MD+GC+CSS+TC
44	5d	P					22.34	5.87		376	1	8	3	0	41.52	2	72	2	208		2	10	MP+CF+VY+MD
45	4d	P					74.5	26.46		215	2	15	0	3	119.45	3	36	3	401		3	14	MP+TC+TP+VN+CSS
46	7d	P		P			255.586.85	141.06		199	3	6	4	2	83.67	2	30	3	132	380	3	17	MP+CF+MD+GC+CSS+TC
47	16h				P		69.3	87.03	Y	78	4	9	3	1	244.17	4	31	3	68		0	15	PT+MD+MS+GC
48	4d	P					60	48.51		288	2	12	2	0	139.11	3	29	3	115		1	11	MP+CF+GC+MD
49	5d	P			P		28	7.13		292	2	15	0	4	396	4	32	3	219		2	15	MP+CF+GC+MD
50	6d	P					70.7	42.55		179	3	12	2	3	78.62	2	29	3	162		1	14	IP+CF+VY+GC
51	6d	P					20.12	16.89		365	1	11	2	3	100.33	2	66	2	198		2	12	MP+CF+GC+MD
52	14d	P					15.2	5.97	Y	134	3	15	0	3	323.73	4	27	3	228		4	17	MP+CF+MD+GC
53	8d	P					10.7	101.87	Y	176	3	12	2	4	171.33	3	45	3	277		4	19	IP+CF+MD+VY
54	9d	P					138	60.39		368	1	15	0	0	132	3	56	2	132		4	10	MP+TP+CF+MD+GC
55	4d					P	22.5	2.53		415	0	15	0	0	31.51	1	360	0	65		0	1	MP+TP+CF+MD+GC
56	6d	P					10.23	6.52		372	1	9	3	0	127.55	3	24	3	410	100	4	14	TC+TP+MP+VN+CSS
57	8d	P					29.01	19.56		209	2	15	0	0	206.33	4	86	2	269		2	10	TC+TP+MP+VN+CSS
58	5d	P					56.52	19.11	Y	152	3	7	3	3	47	2	13	4	69		0	15	TC+MP+VN+CSS
59	3d	P					27.6	8.25		211	2	11	2	0	18.1	0	66	3	90		0	7	MP+VN+CF+GC
60	6d		P				22.6	5.12		343	1	15	0	0	80.63	2	19	4	140		1	8	MP+VY+MD
61	4d		P				16.14	8.97		313	1	15	0	0	77.83	2	45	3	118		1	7	CSS+TC
62	9d	P					167.1	52.09	Y	170	3	3	4	3	122	3	45	3	229		2	18	MP+CF+GC+MD
63	3d		P				106.3	8.21		471	0	12	2	0	72.09	2	119	1	118		1	6	CF+IP+EC
64	12d			P	P		20.7	26.45		245	2	15	0	0	271.63	4	89	2	450		4	12	MP+CF+EC+MS
65	10d				P	P	97.8	2.15		387	1	15	0	4	130.31	3	37	3	230		2	13	MP+VY+MD+GC
66	9d				P	P	30.3	7.22		390	1	15	0	0	52.52	2	108	1	38		0	4	CSS+MD+MS+EC
67	8d				P		3.15	30.4		399	1	15	0	1	300.92	4	46	3	30		0	9	VY+CF+GC+PT
68	10d	P					41.01	11.23		367	1	15	0	1	97.29	2	18	4	45		0	8	MP+CF+GC+MD+VY
69	7d	P					10.8	49.81		316	1	8	3	1	98.05	2	22	3	79		0	10	VY+MP+CF+GC
70	10d		P				71.5	3.64		501	0	13	1	1	35.11	1	70	2	79		0	5	IP+CF+GC
71	4d	P					34.8	20.15		266	2	15	0	1	95.8	2	87	2	147		1	8	VY+MD+MP+CF
72	6d	P					21.13	8.64		231	2	15	0	4	17.13	0	48	3	290		2	11	MP+CF+GC+MD
73	7d		P				56.7	34.39		342	1	15	0	1	31.4	1	21	3	118		1	7	PT+MD+MS+GC
74	5d		P				25.3	38.09		364	1	15	0	1	49.42	2	61	2	87		0	6	CSS+MS+MD+GC
75	6d	P					86.73	58.22		221	2	15	0	4	19.54	0	193	0	195		2	8	MP+CF+GC+MD+VY
76	4d	P					13.98	23.07		253	2	3	4	4	137.39	3	33	3	151		1	17	MP+CF+MD+VY
77	7d	P					56.01	33.6		389	1	15	0	0	69.84	2	81	2	141		1	6	MP+GC+MD+VY+CF
78	3d	P					68.47	7.03		364	1	15	0	1	105.27	3	80	2	136		1	8	MP+GC+MD+VY+CF
79	4d					P	40.49	20.21		388	1	15	0	0	54.49	2	59	2	105		0	5	IP+MP+VY+CF
80	3d	P					47.4	9.91		209	2	15	0	1	65.51	2	69	2	160		1	8	MP+CF+GC+MD+VY
81	3d	P					80.4	39.7		218	2	15	0	1	63.55	2	58	2	78		0	7	EC+VY+VN+IP+CF+CSS
82	4d		P				11.1	55.75		386	1	15	0	1	58.98	2	50	2	140		1	7	GC+MP+VY+CZS
83	9d		P		P		27.93	56.9		216	2	15	0	1	207.49	4	84	2	118		1	10	PT+MD+MS+GC
84	5d	P					31.46	27.32		233	2	3	4	2	290.81	4	243	0	122		2	14	VY+MD+CF+PT
85	3d	P					24.83	50.64	Y	124	3	11	2	1	38.16	2	69	2	374		3	13	MP+VY
